# Supplementary material
Source: PubMed Central journal article supplement (PMC6511061)
Supplement: pnas.1902227116.sapp.pdf [file pnas.1902227116.sapp.pdf]

## Supplementary Information for

### **Circulating heparin oligosaccharides rapidly target the hippocampus in sepsis potentially impacting cognitive functions**

Xing Zhang, Xiaorui Han, Ke Xia, Yongmei Xu, Yimu Yang, Kaori Oshima, Sarah M. Haeger, Mario J. Perez, Sarah A. McMurtry, Joseph A. Hippensteel, Joshay A. Ford, Paco S. Herson, Jian Liu, Eric P. Schmidt, Robert J. Linhardt

Robert J. Linhardt  
Email: [linhar@rpi.edu](mailto:linhar@rpi.edu)

#### **This PDF file includes:**

Figs. S1 to S3  
Tables S1 to S5

Exact mass: 2652.8997

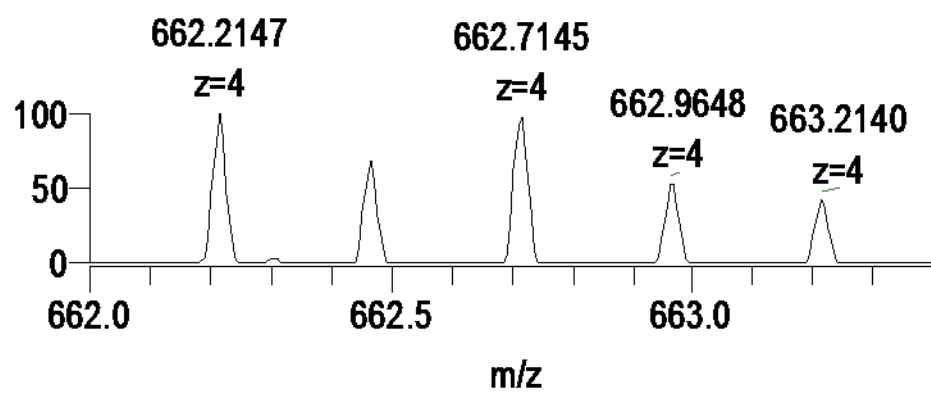

Fig. S1. HRMS (negative model) of compound 11.

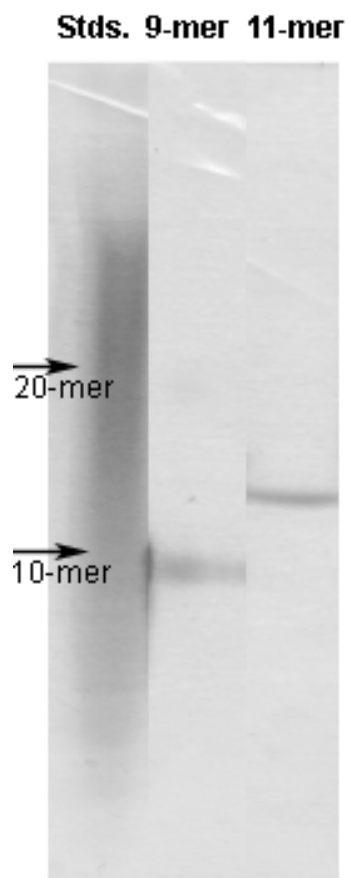

**Fig. S2.** PAGE analysis of compound **11** (9-mer) and **9** (11-mer). Heparin oligosaccharide standards prepared from partial heparin lyase 1 depolymerization of bovine lung heparin are shown on left by counting bands from disaccharide up five bands to 10-mer and 10 bands to 20-mer molecular size can be determined.

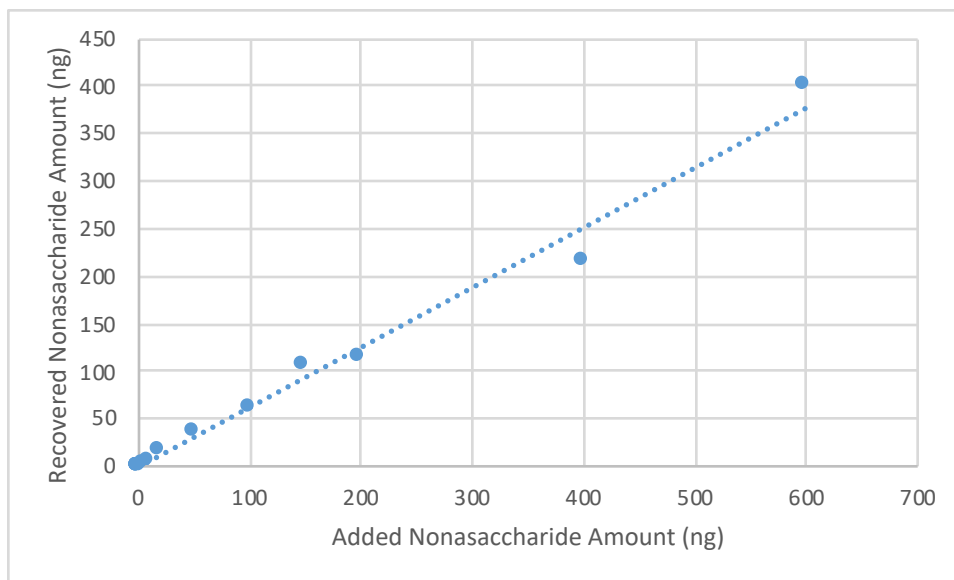

**Fig. S3.** Nonsaccharide recovery was linear over the range of 0.01-600 ng in 5  $\mu$ L of plasma sample. ( $y = 0.6302x + 0.0152$ ,  $R^2 = 0.9877$ )

**Table S1.  $^1\text{H}$  NMR chemical shift assignments (in ppm) of compound 9**

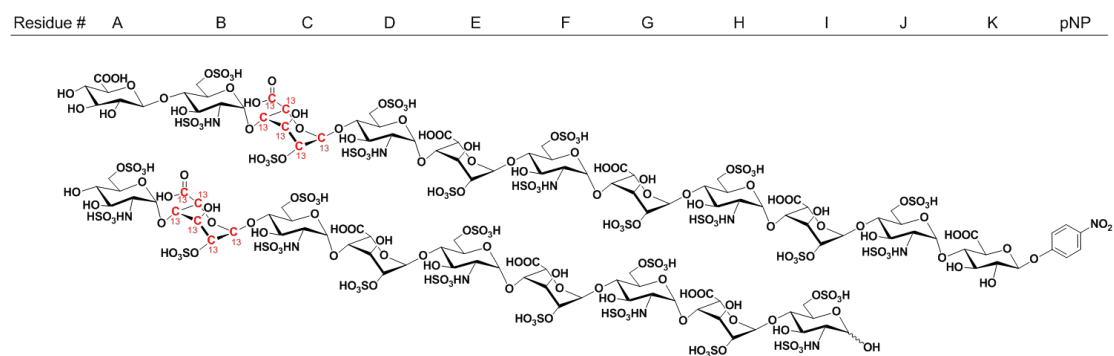

|   | 1    | 2    | 3    | 4    | 5    | 6a   | 6b   |
|---|------|------|------|------|------|------|------|
| A | 4.53 | 3.28 | 3.47 | 3.41 | 3.69 | —    | —    |
| B | 5.34 | 3.20 | 3.59 | 3.68 | 3.97 | 4.13 | 4.27 |
| C | 5.15 | 4.25 | 4.12 | 4.02 | 4.74 | —    | —    |
| D | 5.34 | 3.20 | 3.59 | 3.68 | 3.97 | 4.13 | 4.27 |
| E | 5.15 | 4.25 | 4.12 | 4.02 | 4.74 | —    | —    |
| F | 5.34 | 3.20 | 3.59 | 3.68 | 3.97 | 4.13 | 4.27 |
| G | 5.15 | 4.25 | 4.12 | 4.02 | 4.74 | —    | —    |
| H | 5.34 | 3.20 | 3.59 | 3.68 | 3.97 | 4.13 | 4.27 |
| I | 5.15 | 4.25 | 4.12 | 4.02 | 4.74 | —    | —    |
| J | 5.53 | 3.23 | 3.60 | 3.75 | 3.89 | 4.15 | 4.33 |
| K | 5.22 | 3.65 | 3.89 | 3.78 | 3.92 | —    | —    |

**Table S2.  $^1\text{H}$  NMR chemical shift assignments (in ppm) of compound 11**



|   | 1    | 2    | 3    | 4    | 5    | 6a   | 6b   |
|---|------|------|------|------|------|------|------|
| A | 5.33 | 3.20 | 3.58 | 3.50 | 3.90 | 4.19 | 4.33 |
| B | 5.16 | 4.26 | 4.15 | 4.04 | 4.83 | —    | —    |
| C | 5.33 | 3.20 | 3.58 | 3.70 | 3.90 | 4.19 | 4.33 |
| D | 5.16 | 4.26 | 4.15 | 4.04 | 4.83 | —    | —    |
| E | 5.33 | 3.20 | 3.58 | 3.70 | 3.90 | 4.19 | 4.33 |
| F | 5.16 | 4.26 | 4.15 | 4.04 | 4.83 | —    | —    |
| G | 5.33 | 3.20 | 3.58 | 3.70 | 3.90 | 4.19 | 4.33 |
| H | 5.16 | 4.26 | 4.15 | 4.04 | 4.83 | —    | —    |
| I | 5.33 | 3.20 | 3.58 | 3.70 | 3.90 | 4.19 | 4.33 |

**Table S3. Nonasaccharide recovery percentage in plasma.**

| Nonasaccharide amount added to plasma (ng) | Plasma ( $\mu$ L) | Nonasaccharide recovered Amount (ng) | Recovery Percentage |
|--------------------------------------------|-------------------|--------------------------------------|---------------------|
| 0.01                                       | 5                 | 0.0052                               | 52%                 |
| 0.05                                       | 5                 | 0.0435                               | 87%                 |
| 0.1                                        | 5                 | 0.071                                | 71%                 |
| 0.5                                        | 5                 | 0.395                                | 79%                 |
| 1                                          | 5                 | 0.74                                 | 74%                 |
| 2                                          | 5                 | 1.28                                 | 64%                 |
| 5                                          | 5                 | 3.85                                 | 77%                 |
| 10                                         | 5                 | 6.9                                  | 69%                 |
| 20                                         | 5                 | 16.6                                 | 83%                 |
| 50                                         | 5                 | 36.5                                 | 73%                 |
| 100                                        | 5                 | 63                                   | 63%                 |
| 150                                        | 5                 | 106.5                                | 71%                 |
| 200                                        | 5                 | 116                                  | 58%                 |
| 400                                        | 5                 | 216                                  | 54%                 |
| 600                                        | 5                 | 402                                  | 67%                 |

**Table S4. Weight and volume information for sampled organs. Range, mean, and standard deviation for the defatted-dry weight (milligrams) of brain, muscle, liver, spleen, fat, heart, kidney, lung and hippocampus. Range, mean, and standard deviation for the volumes of collected plasma and urine.**

| <b>Organ</b> | <b>Brain</b> | <b>Muscle</b> | <b>Liver</b> | <b>Spleen</b> | <b>Fat</b> | <b>Heart</b> | <b>Kidney</b> | <b>Lung</b> | <b>Hippocampus</b> | <b>Plasma (µL)</b> | <b>Urine (µL)</b> |
|--------------|--------------|---------------|--------------|---------------|------------|--------------|---------------|-------------|--------------------|--------------------|-------------------|
| Range (mg)   | 21.9-45.5    | 42.8-109.6    | 23.7-241.9   | 23.1-123.7    | 9.4-55.1   | 33.1-86.6    | 36.3-86.3     | 13.1-25.8   | 1.7-5.5            | 20-340             | 40-200            |
| Mean (mg)    | 35.0         | 60.8          | 113.5        | 36.2          | 17.4       | 43.6         | 50.1          | 18.0        | 2.8                | 151.7              | 156.2             |
| Std. Dev.    | 8.5          | 14.7          | 40.7         | 21.0          | 9.0        | 12.0         | 12.2          | 3.2         | 0.9                | 59.1               | 88.5              |



**Table S5. The average and standard deviation for the amounts of nonasaccharide quantified in organs (ng/mg) and biological fluids (ng/mL). The LOQ for the LC-MS method is 70 pg, and LOD is 20 pg. If between LOD and LOQ but shows both <sup>13</sup>C and <sup>12</sup>C peak with identical retention time then presence is recorded. If between LOD and LOQ and both <sup>13</sup>C and <sup>12</sup>C peaks are not detected then no presence is recorded.**

| Organ                           | Brain | Muscle | Liver   | Spleen | Fat   | Heart | Kidney | Lung  | Hippocampus | Urine (ng/mL) | Plasma (ng/mL) |
|---------------------------------|-------|--------|---------|--------|-------|-------|--------|-------|-------------|---------------|----------------|
| Control Mean (ng/mg)            | 0     | 0      | 0       | 0      | 0     | 0     | 0      | 0     | 0           | 0             | 0              |
| Sham 30 min mean (ng/mg)        | 0     | 0      | 0       | 0.001  | 0     | 0     | 0      | 0     | 0           | 12791         | 1100           |
| Sham 30 min standard deviation  | 0     | 0      | 0       | 0.001  | 0     | 0     | 0      | 0     | 0           | 722           | 135            |
| Sham 120 min mean (ng/mg)       | 0     | 0      | 0       | 0.005  | 0.003 | 0.003 | 0.002  | 0     | 0           | 9438          | 529            |
| Sham 120 min standard deviation | 0     | 0      | 0       | 0.005  | 0.005 | 0.005 | 0.003  | 0     | 0           | 6749          | 58             |
| Sham 240 min mean (ng/mg)       | 0     | 0      | 0.002   | 0.001  | 0.005 | 0.005 | 0.003  | 0     | 0           | 8813          | 0              |
| Sham 240 min standard deviation | 0     | 0      | 0.003   | 0.002  | 0.005 | 0.001 | 0.003  | 0     | 0           | 3212          | 0              |
| CLP 30 min mean (ng/mg)         | 0     | 0      | 0       | 0.002  | 0     | 0     | 0      | 0     | 0.285       | 5739          | 14450          |
| CLP 30 min standard deviation   | 0     | 0      | 0       | 0.005  | 0     | 0.001 | 0.001  | 0     | 0.045       | 0             | 2030           |
| CLP 120 min mean (ng/mg)        | 0.002 | 0      | 0       | 0.006  | 0     | 0     | 0      | 0.005 | 0.319       | 7723          | 0              |
| CLP 120 min standard deviation  | 0.002 | 0      | 0       | 0.008  | 0     | 0     | 0      | 0.006 | 0.088       | 4629          | 0              |
| CLP 240 min mean (ng/mg)        | 0     | 0      | 0.003   | 0.004  | 0.009 | 0     | 0      | 0     | 0.361       | 795           | 0              |
| CLP 240 min standard deviation  | 0     | 0      | 0.00296 | 0.004  | 0.008 | 0     | 0      | 0     | 0.040       | 924           | 0              |
